# Supplementary material for: Boosting the salt recognition abilities of l-ornithine based multitopic molecular receptors by harnessing a double cooperative effect
Source: Royal Society of Chemistry journal article supplement (doi:10.1039/c4dt00576g), 2014-01-01
Supplement: c4dt00576g1.pdf [file c4dt00576g1.pdf]

**Boosting the salt recognition abilities of L-ornithine based multitopic molecular receptors by harnessing a double cooperative effect**

by

*Piotr Piątek, Marcin Karbarz, Jan Romański\**

**Department of Chemistry, University of Warsaw, Pasteura 1, 02-093 Warsaw, Poland**

**GENERAL INFORMATIONS**

Unless specifically indicated, all other chemicals and reagents used in this study were purchased from commercial sources and used as received. 18-Aza-crown-6 was prepared according to literature procedure.<sup>1</sup> Compounds **1a**, **1c** and **S2** were prepared according to literature procedure.<sup>2</sup> Purification of products was performed using column chromatography on silica gel (Merck Kieselgel 60, 230-400 mesh) with mixtures of chloroform/methanol. Thin-layer chromatography (TLC) was performed on silica gel plates (Merck Kieselgel 60 F254).

<sup>1</sup>H and <sup>13</sup>C NMR spectra used in the characterization of products were recorded on Varian Unity 200 spectrometer using a TMS ( $\delta=0.00$ ) or residual protonated solvent as internal standard. The following abbreviations are used to indicate the multiplicity: s - singlet; d - doublet; t - triplet; q - quartet; m - multiplet, b – broad signal.

High resolution mass spectra (HRMS) were measured on a Quattro LC Micromass unit using ESI technique.

UV-vis analyses were performed using Thermo Spectronic Unicam UV500 Spectrophotometer. Atomic absorption measurements were performed using Perkin Elmer AAnalyst 300 spectrometer.

The conductance was measured using a conductance meter, Radiometer model CDM230, with a CDC241-9 conductivity cell.

## SYNTHESIS

### Receptor 1b

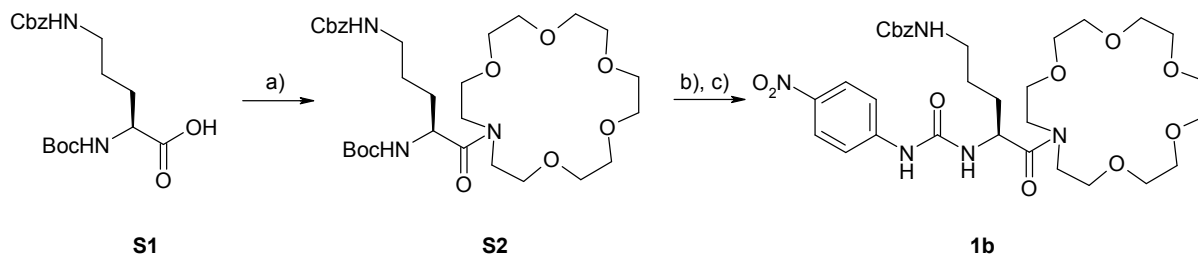

**Scheme S1.** Synthesis of receptor **1b**. *Reagents and conditions:* a) DCC, 1-aza-18-crown-6,  $\text{CH}_2\text{Cl}_2$ ,  $0^\circ\text{C}$  to r.t., 92%; b) TFA-  $\text{CH}_2\text{Cl}_2$  (1:1), r.t., quantitative; c) 4-nitrophenyl isocyanate, THF, 73%.

### Receptor 1d

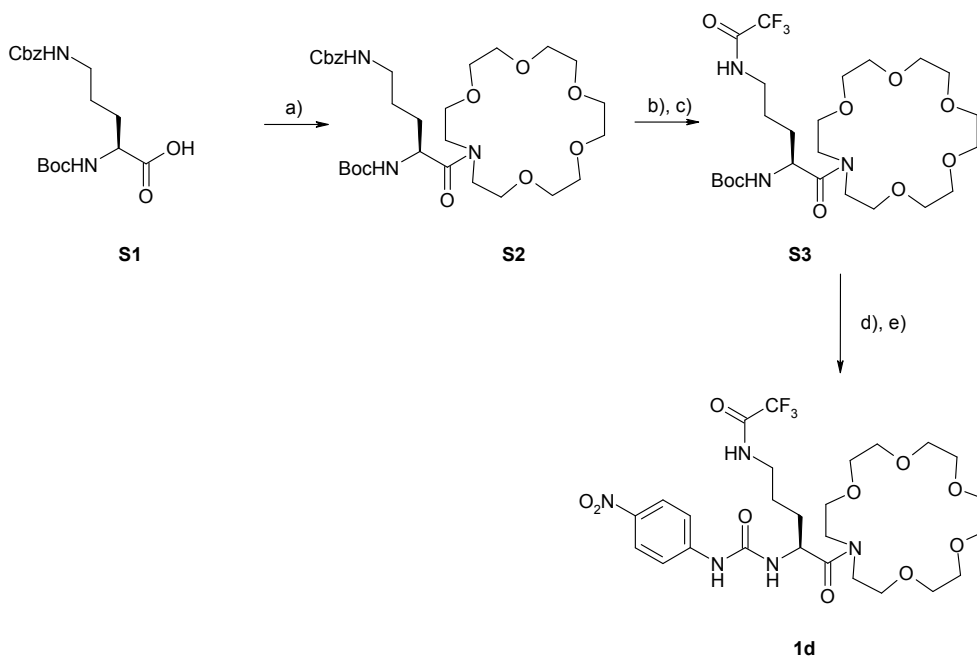

**Scheme S2.** Synthesis of receptor **1d**. *Reagents and conditions:* a) DCC, 1-aza-18-crown-6,  $\text{CH}_2\text{Cl}_2$ ,  $0^\circ\text{C}$  to r.t., 92%; b)  $\text{H}_2$ , Pd/C, MeOH-THF, r.t., quantitative; c) trifluoroacetyl anhydride,  $\text{Et}_3\text{N}$ ,  $\text{CH}_2\text{Cl}_2$ ,  $0^\circ\text{C}$  to r.t., 72%; d) TFA-  $\text{CH}_2\text{Cl}_2$  (1:1), r.t., quantitative; e) 4-nitrophenyl isocyanate,  $\text{Et}_3\text{N}$ , THF, 60%.

### Receptor 1e

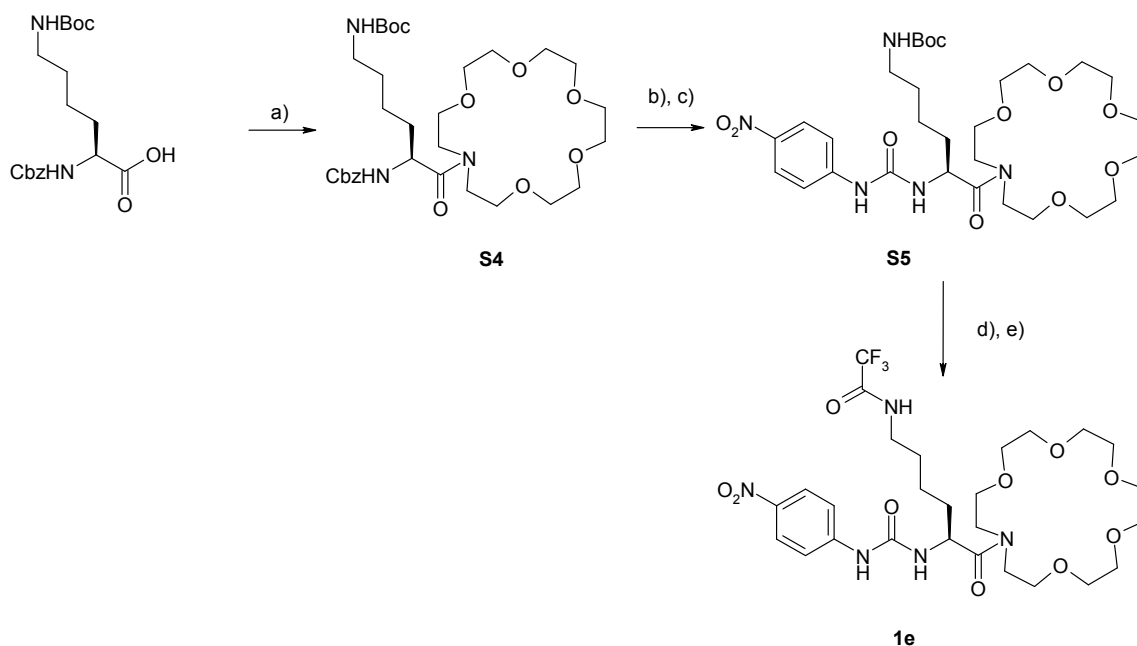

**Scheme S3.** Synthesis of receptor **1e**. *Reagents and conditions:* a) DCC, 1-aza-18-crown-6,  $\text{CH}_2\text{Cl}_2$ ,  $0^\circ\text{C}$  to r.t., 91%; b)  $\text{H}_2$ , Pd/C, MeOH-THF, r.t., quantitative; c) 4-nitrophenyl isocyanate, THF, 81%; d) TFA-  $\text{CH}_2\text{Cl}_2$  (1:1), r.t., quantitative; e) trifluoroacetyl anhydride,  $\text{Et}_3\text{N}$ ,  $\text{CH}_2\text{Cl}_2$ ,  $0^\circ\text{C}$  to r.t., 73%.

### Receptor 1f

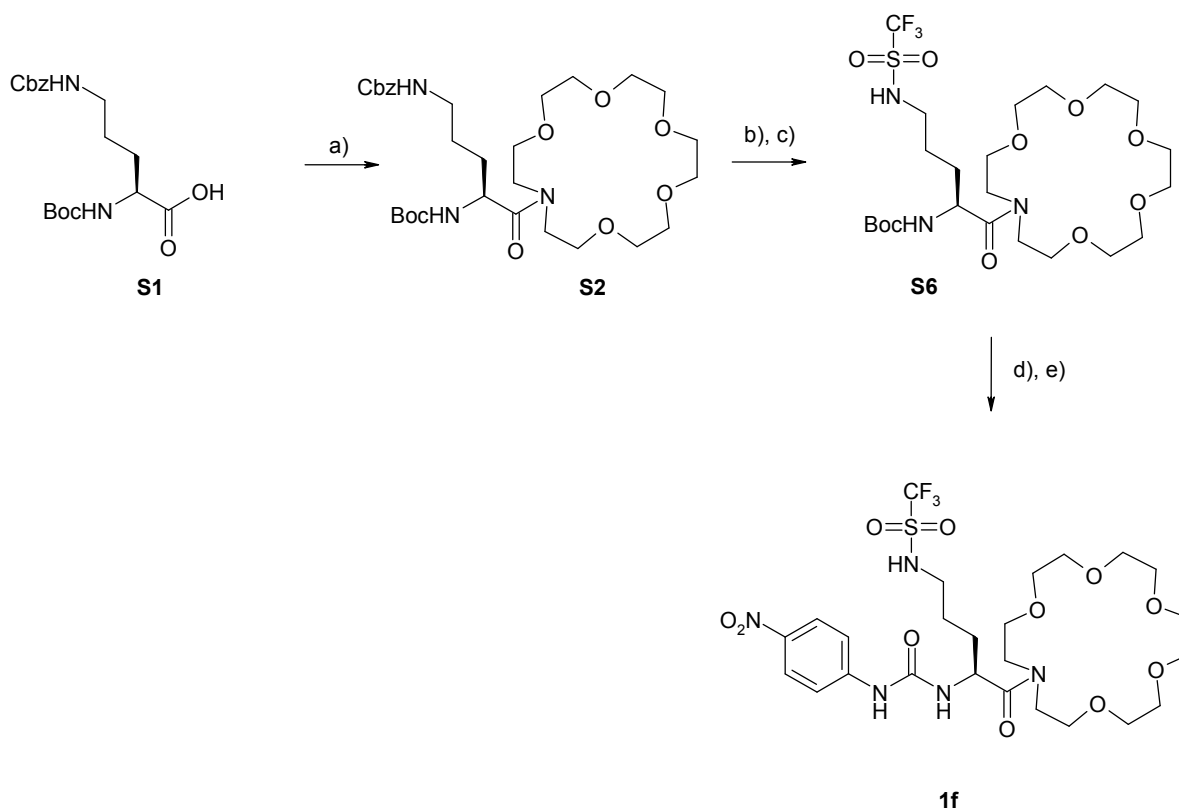

**Scheme S4.** Synthesis of receptor **1f**. *Reagents and conditions:* a) DCC, 1-aza-18-crown-6,  $\text{CH}_2\text{Cl}_2$ ,  $0^\circ\text{C}$  to r.t., 92%; b)  $\text{H}_2$ , Pd/C, MeOH-THF, r.t., quantitative; c) trifluoromethanesulfonyl chloride,  $\text{Et}_3\text{N}$ ,  $\text{CH}_2\text{Cl}_2$ ,  $0^\circ\text{C}$  to r.t., 91%; d) TFA-  $\text{CH}_2\text{Cl}_2$  (1:1), r.t., quantitative; e) 4-nitrophenyl isocyanate,  $\text{Et}_3\text{N}$ , THF, 72%.

### Compound S3:

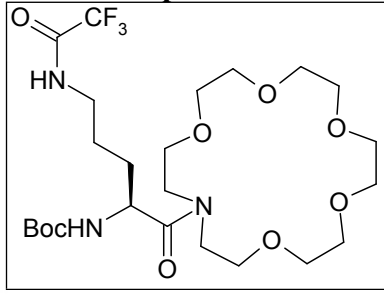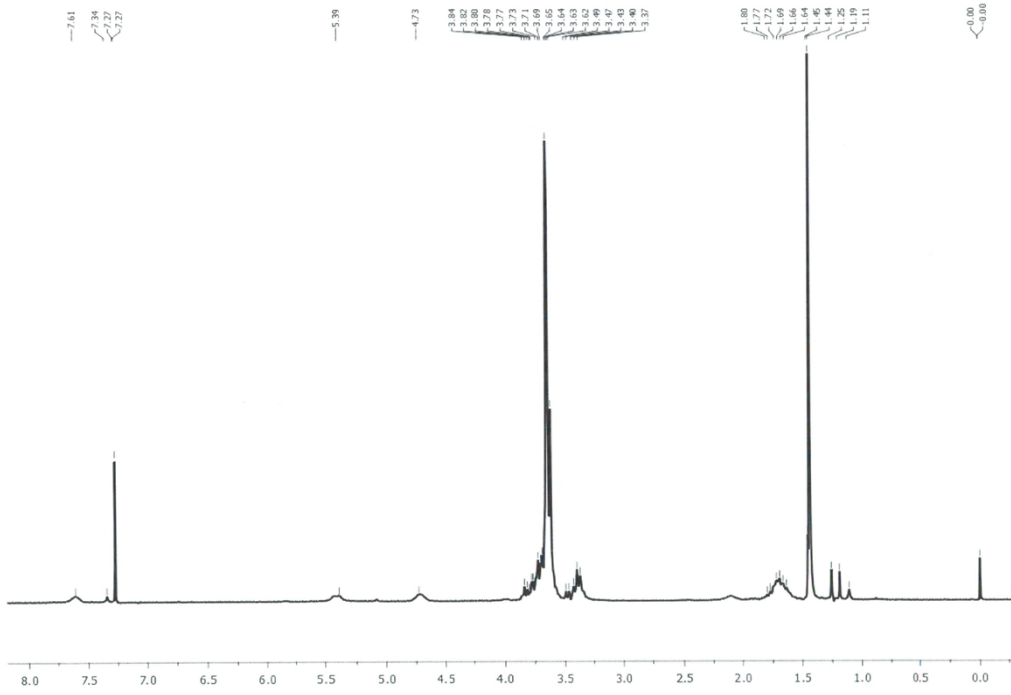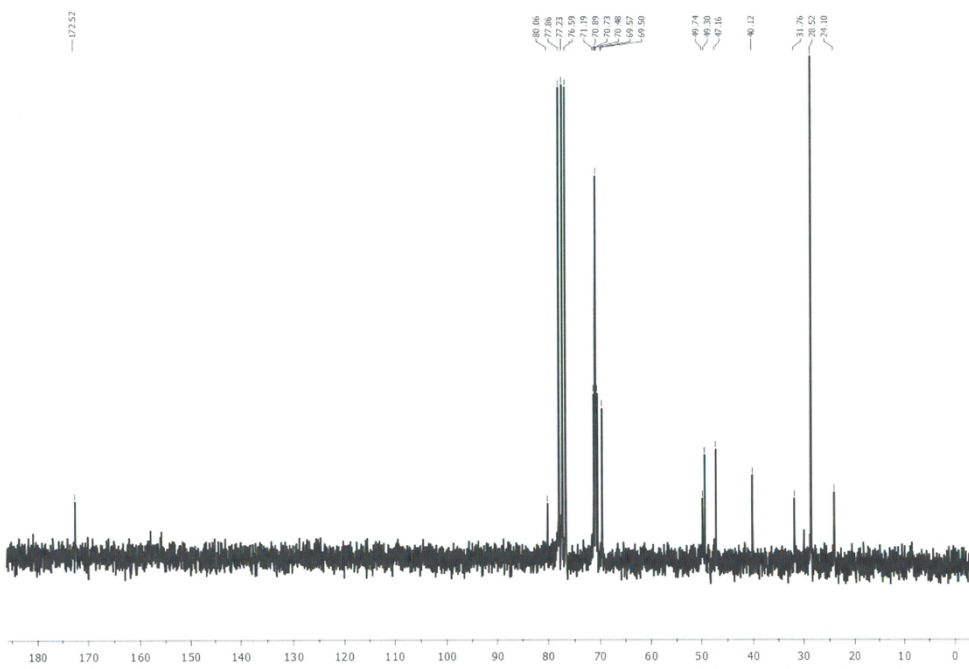

# Receptor 1d:

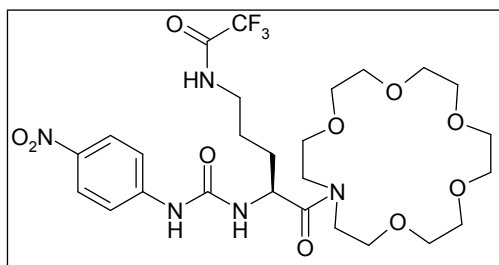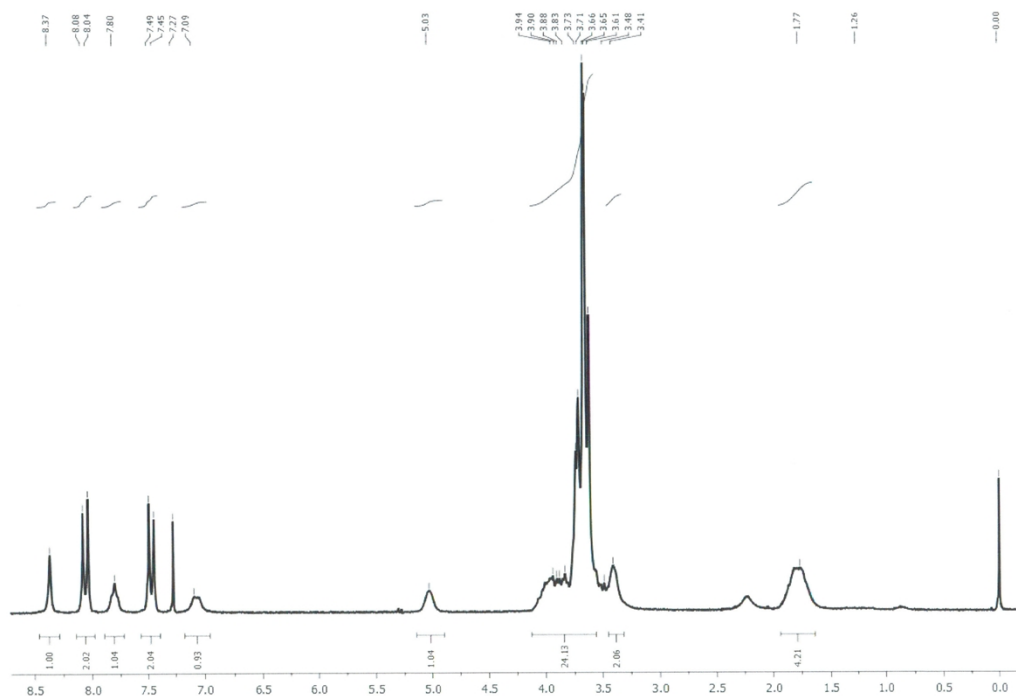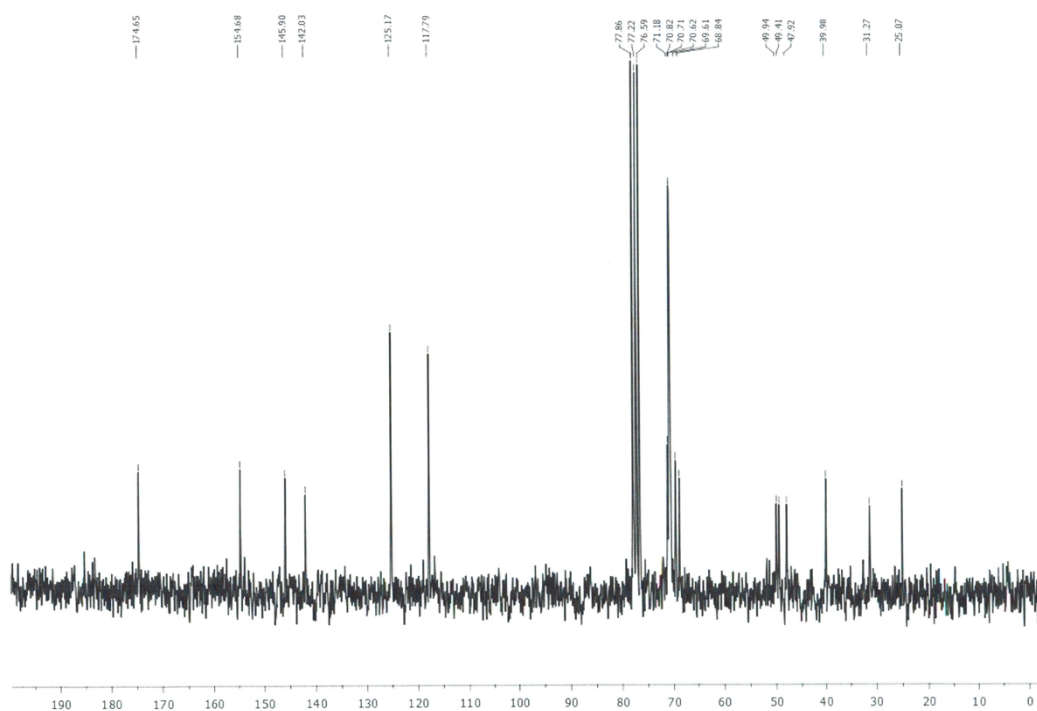

### Compound S4:

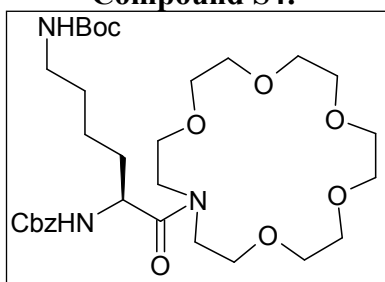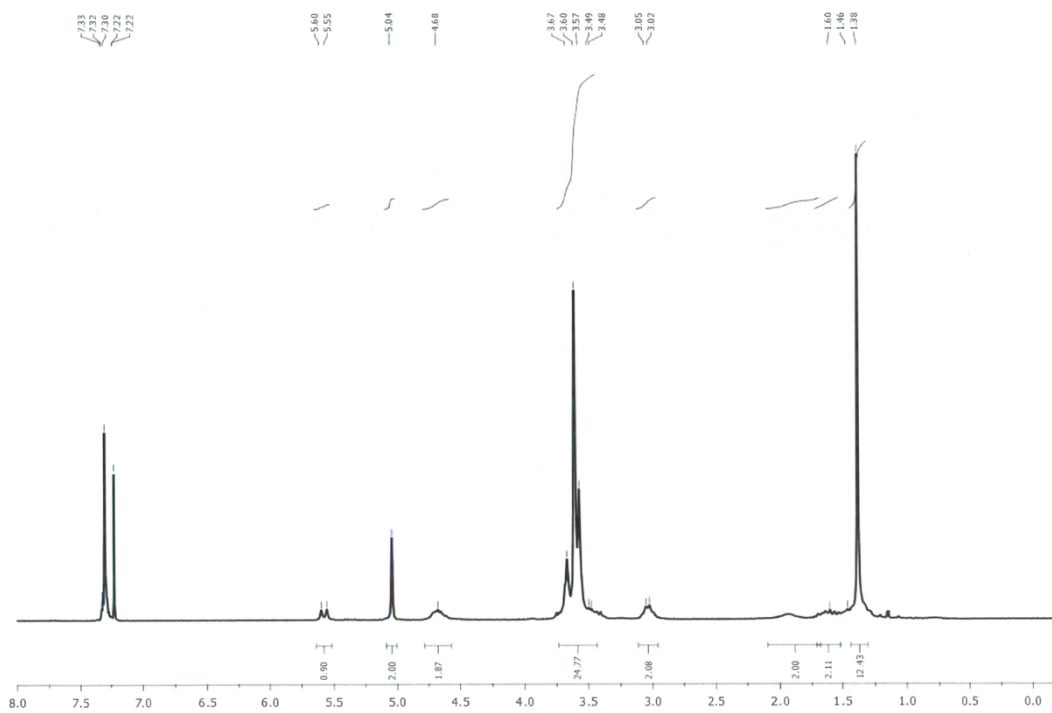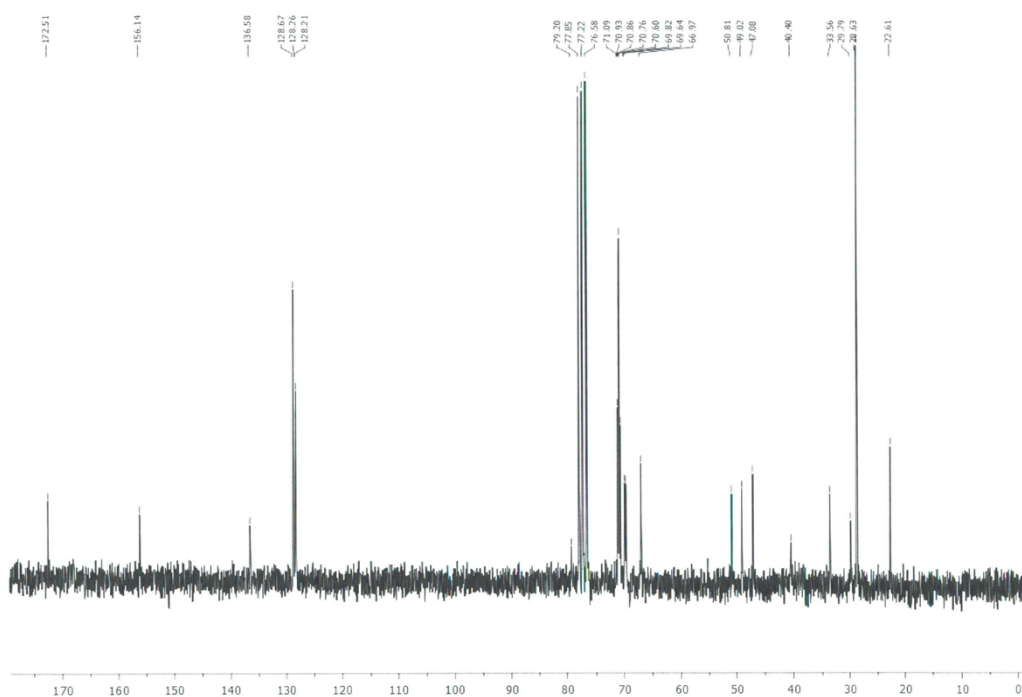

### Compound S5:

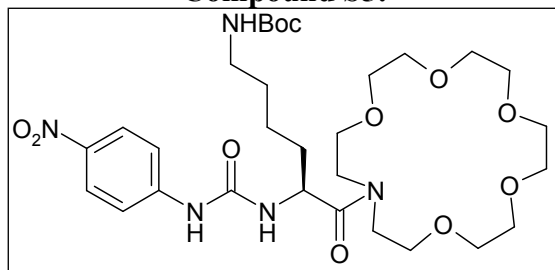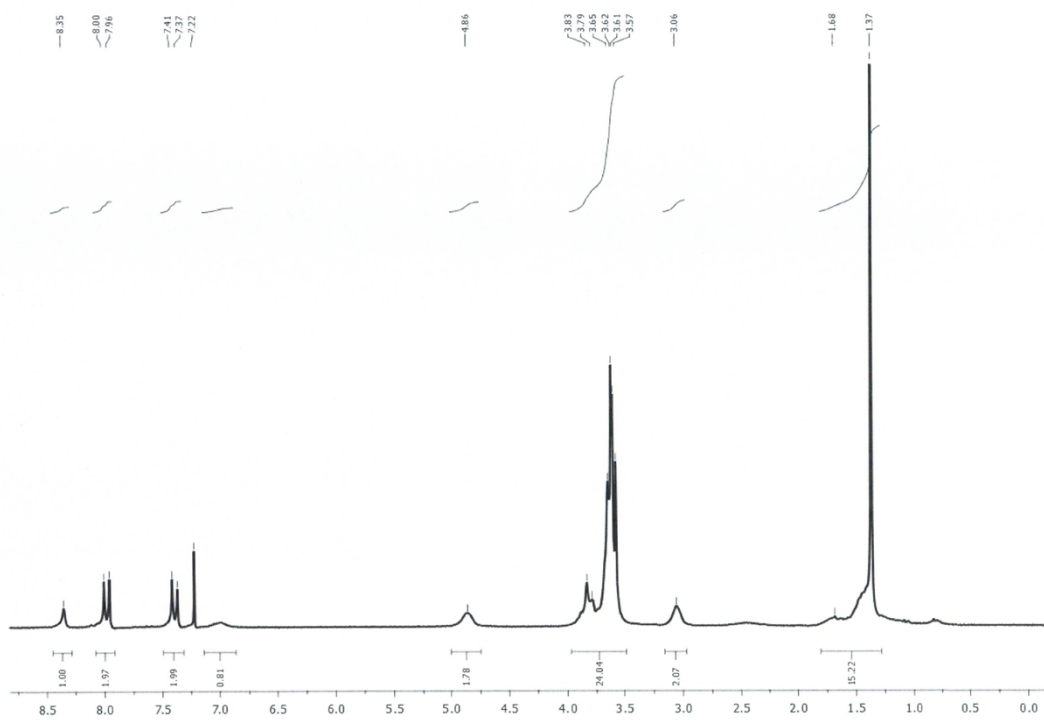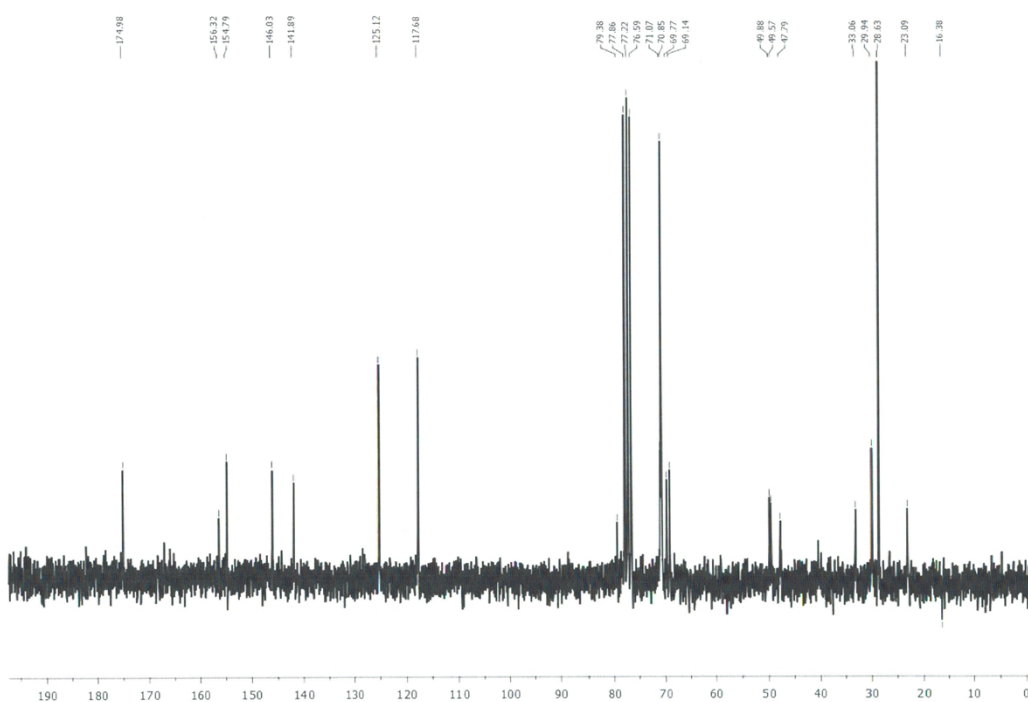

### Receptor 1e:

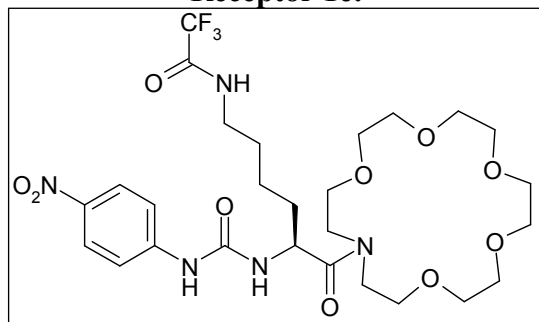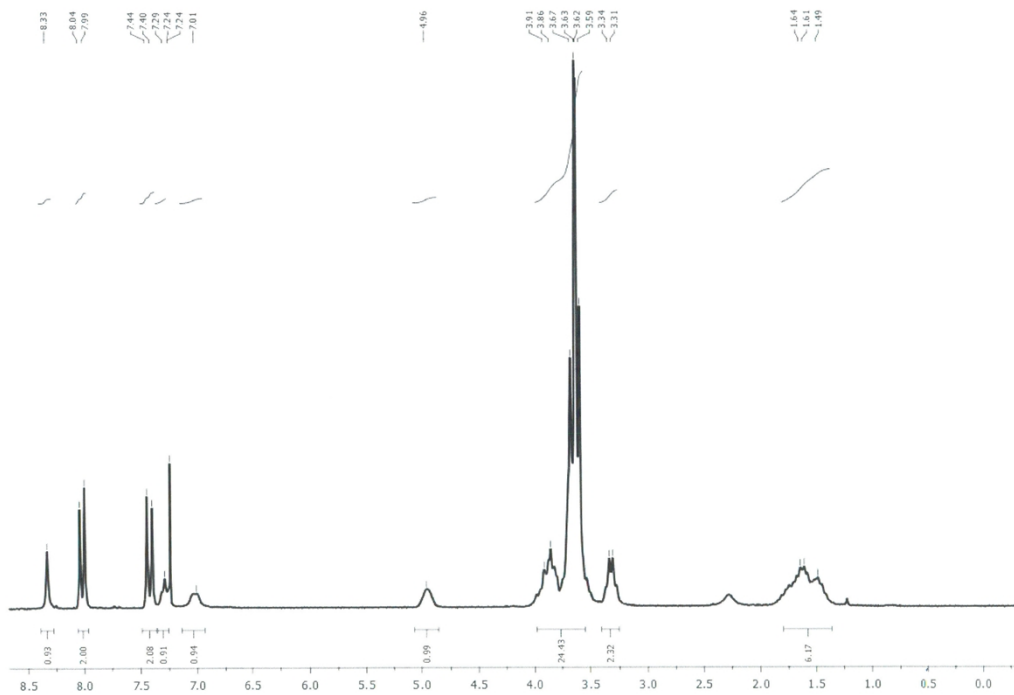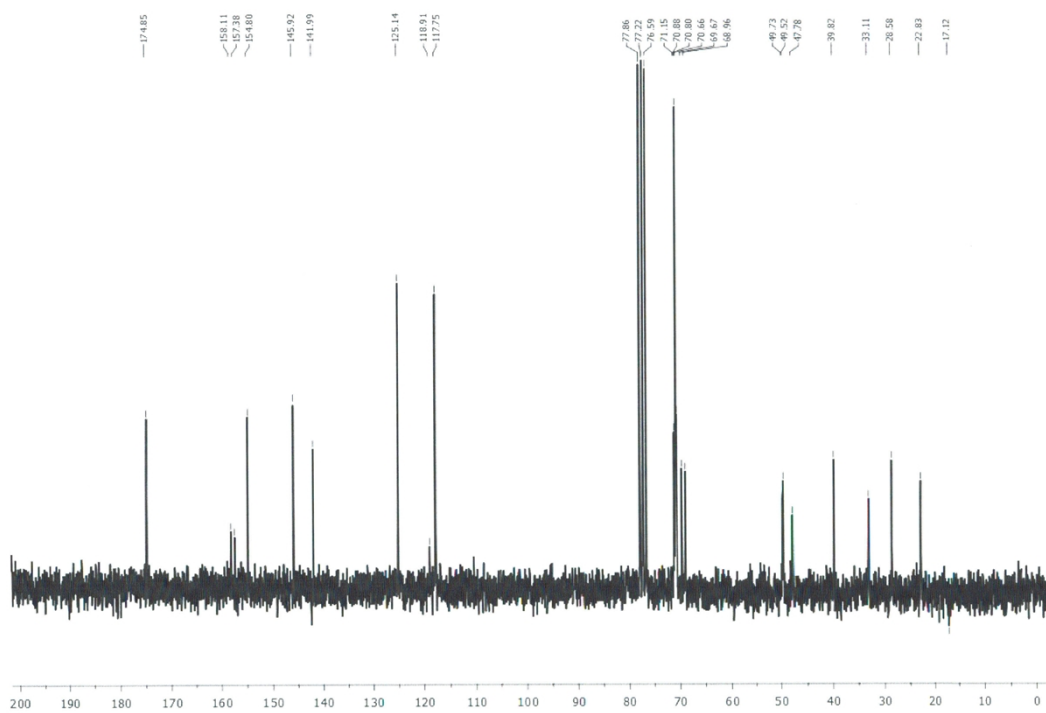



### Compound S6:

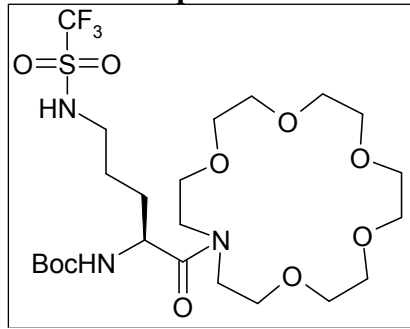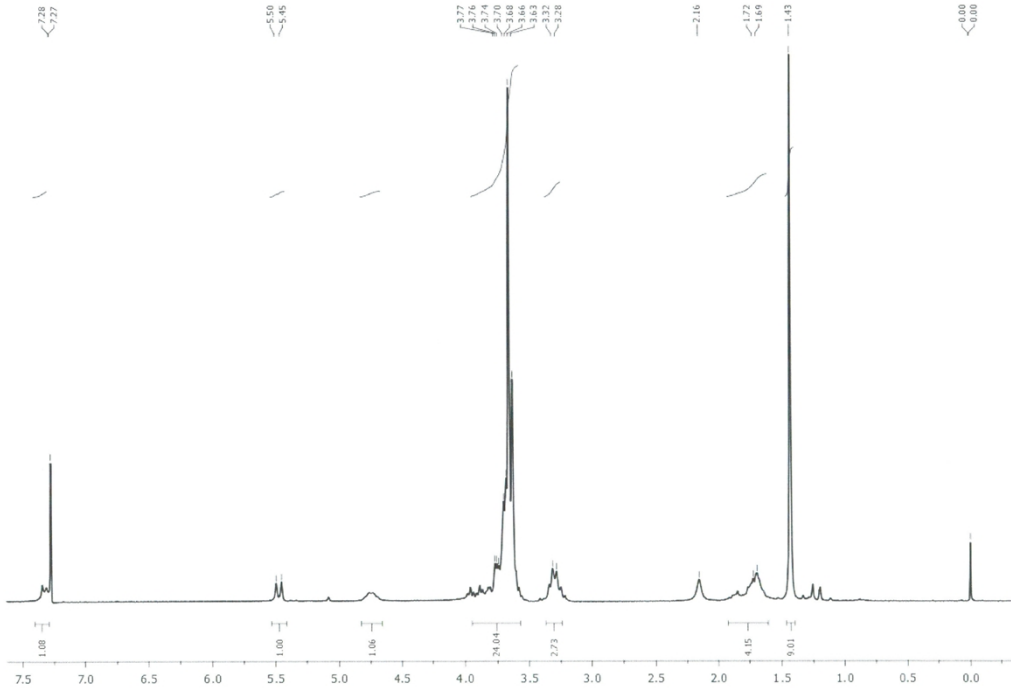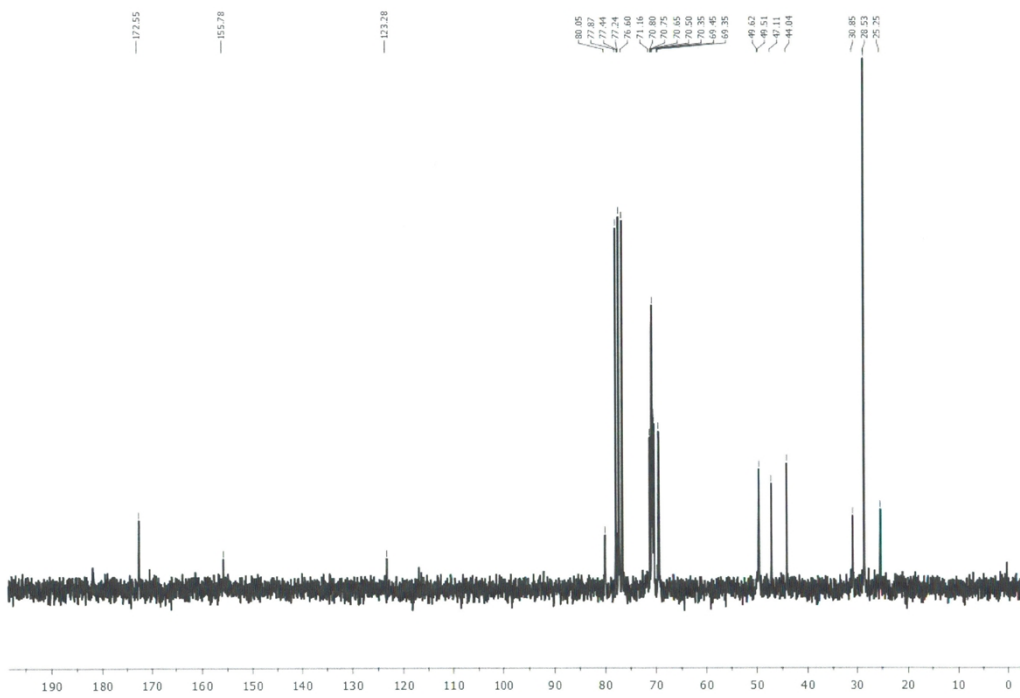

**Receptor 1f:**

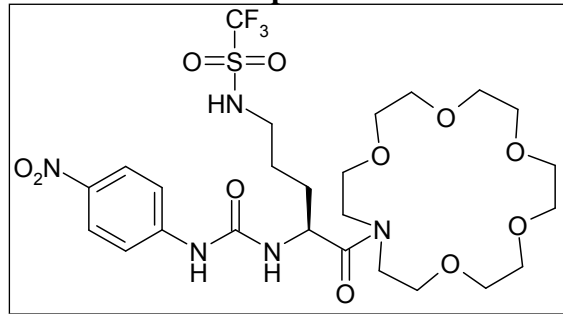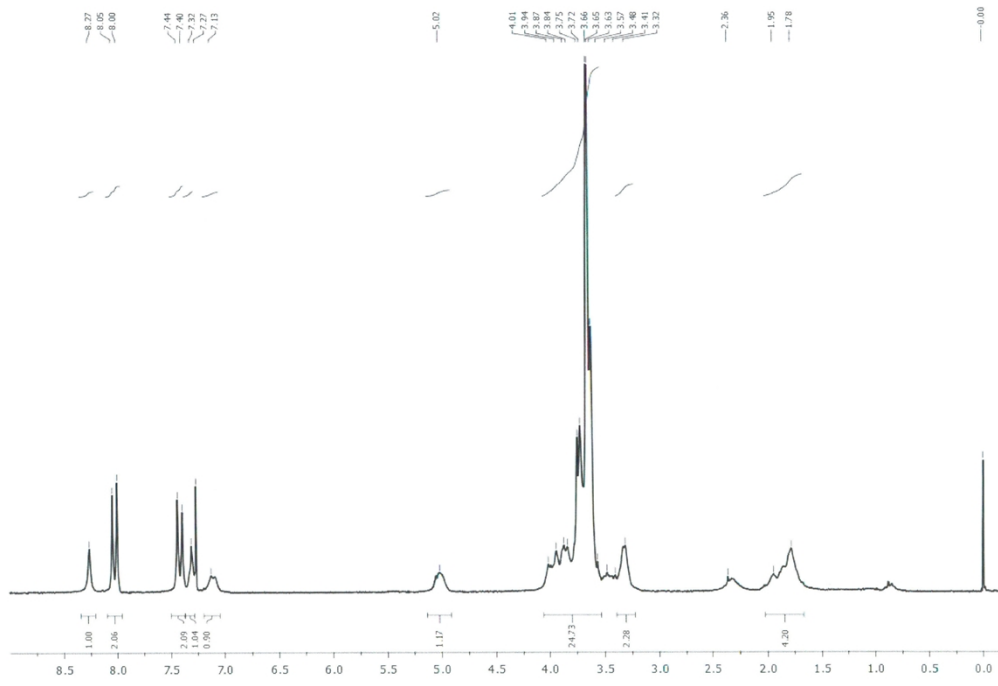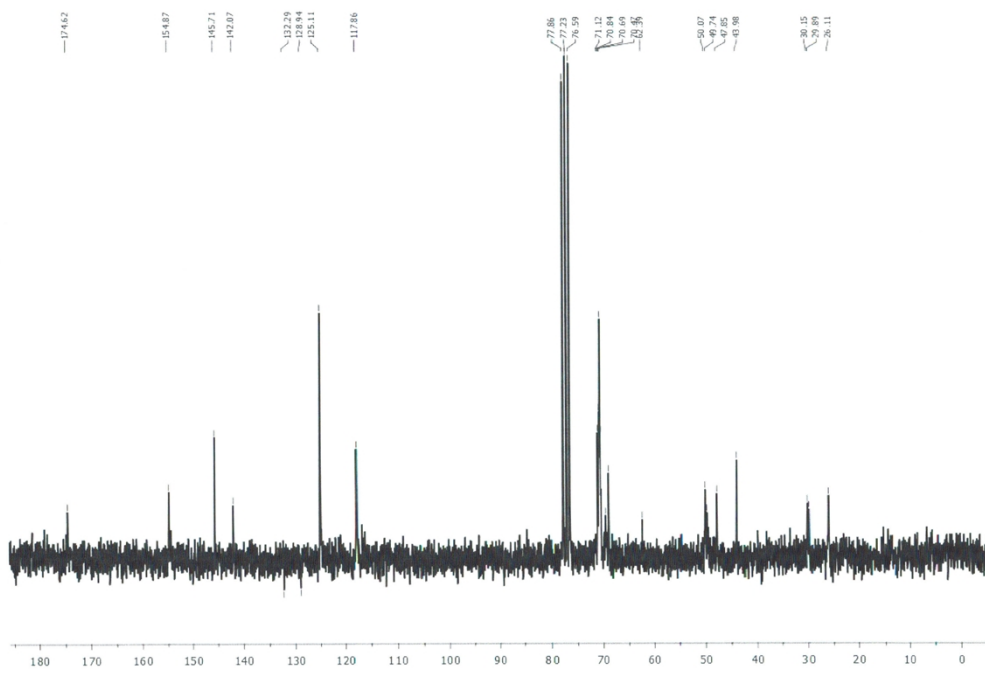

## NMR TITRATIONS

The  $^1\text{H}$  NMR titrations were performed on a Varian UnityPlus 200MHz spectrometer, at 298K in  $\text{CD}_3\text{CN}$ . The anion TBA and cation  $\text{PF}_6$  salts were dried under high vacuum at 30–45 °C prior to use. In each case, a 500  $\mu\text{L}$  of freshly prepared 2.7 mM solution of receptor **1** was added to a 5mm NMR tube. Where applicable the solution also contained 1 molar equivalent of sodium hexafluorophosphate. Small aliquots of 10–20 mM solution of tetrabutylammonium anion salts, containing **1** at 2.7 mM concentration, were added and a spectrum was acquired after each addition. Titration isotherms for NH protons were fitted to a 1:1 binding model using the HypNMR 2000 program. The 1:1 binding stoichiometries were verified by a Job plot analysis.

Selected binding isotherms:

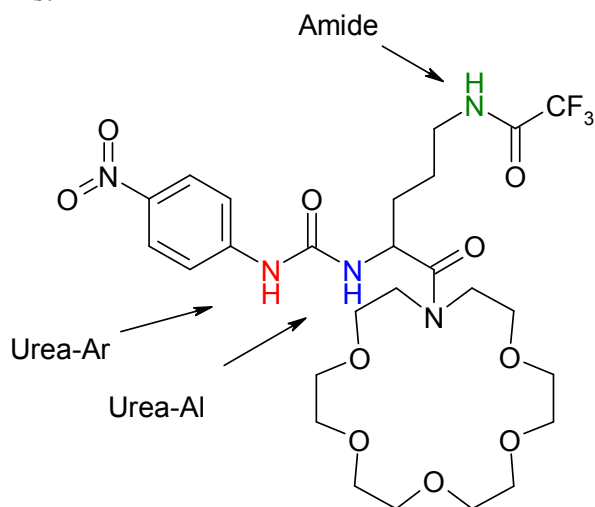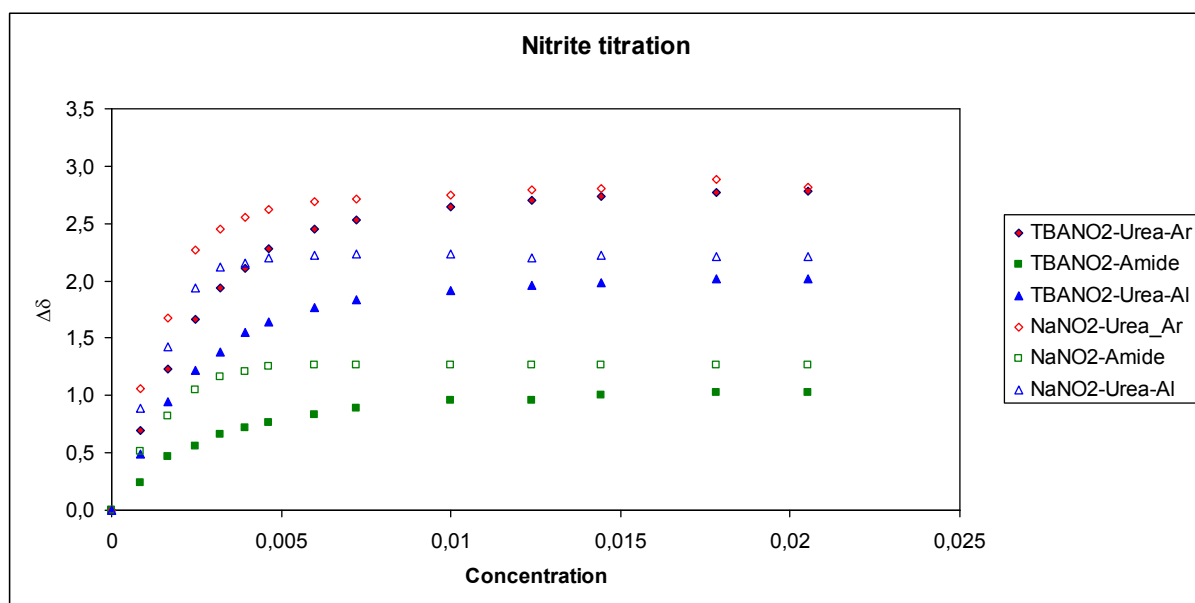

|                 | $K_{\text{TBA}}$ | $K_{\text{Na}}$ | $K_{\text{Na}}/K_{\text{TBA}}$ |
|-----------------|------------------|-----------------|--------------------------------|
| $\text{NO}_2^-$ | 1 450            | 19 000          | 13,1                           |

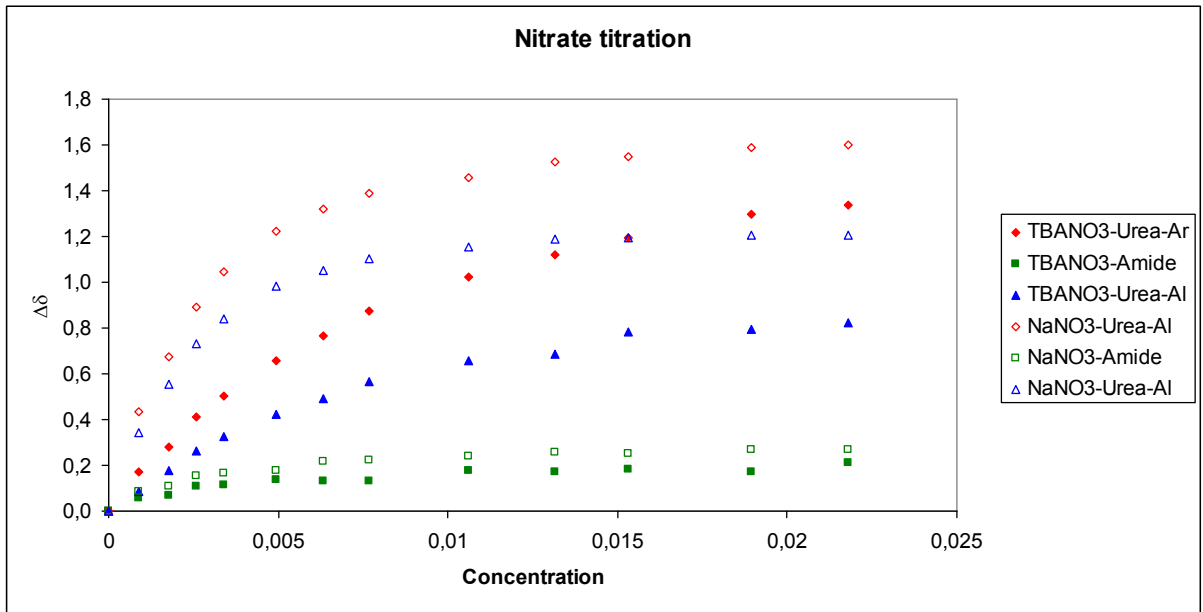

|          | $K_{TBA}$ | $K_{Na}$ | $K_{Na}/K_{TBA}$ |
|----------|-----------|----------|------------------|
| $NO_3^-$ | 150       | 1 250    | 8,2              |

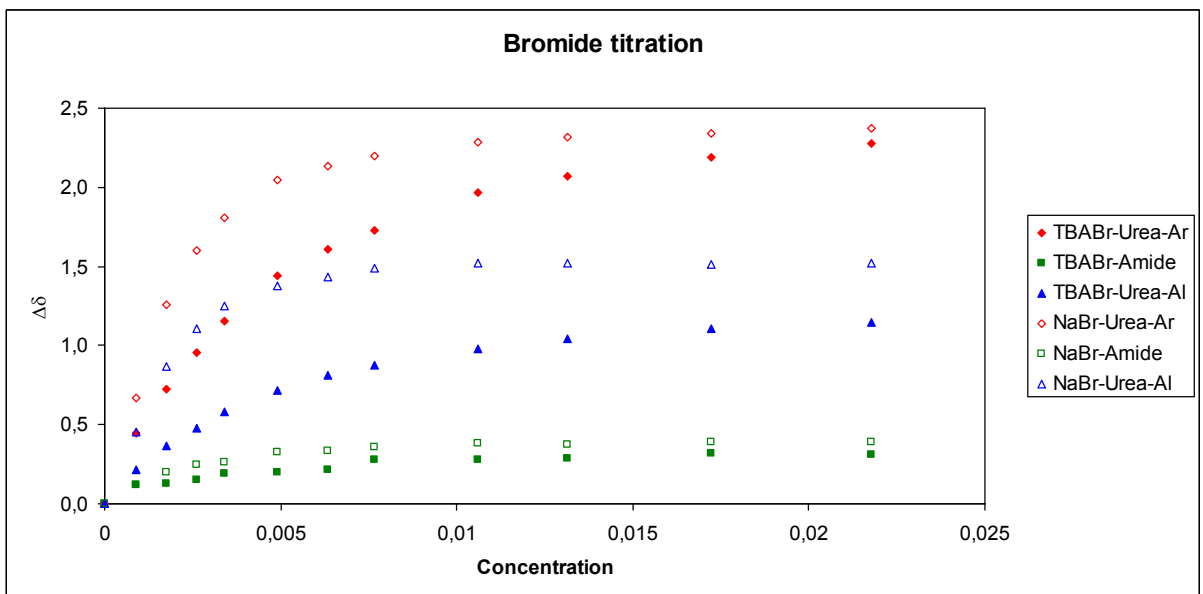

|        | $K_{TBA}$ | $K_{Na}$ | $K_{Na}/K_{TBA}$ |
|--------|-----------|----------|------------------|
| $Br^-$ | 390       | 3 450    | 8,8              |

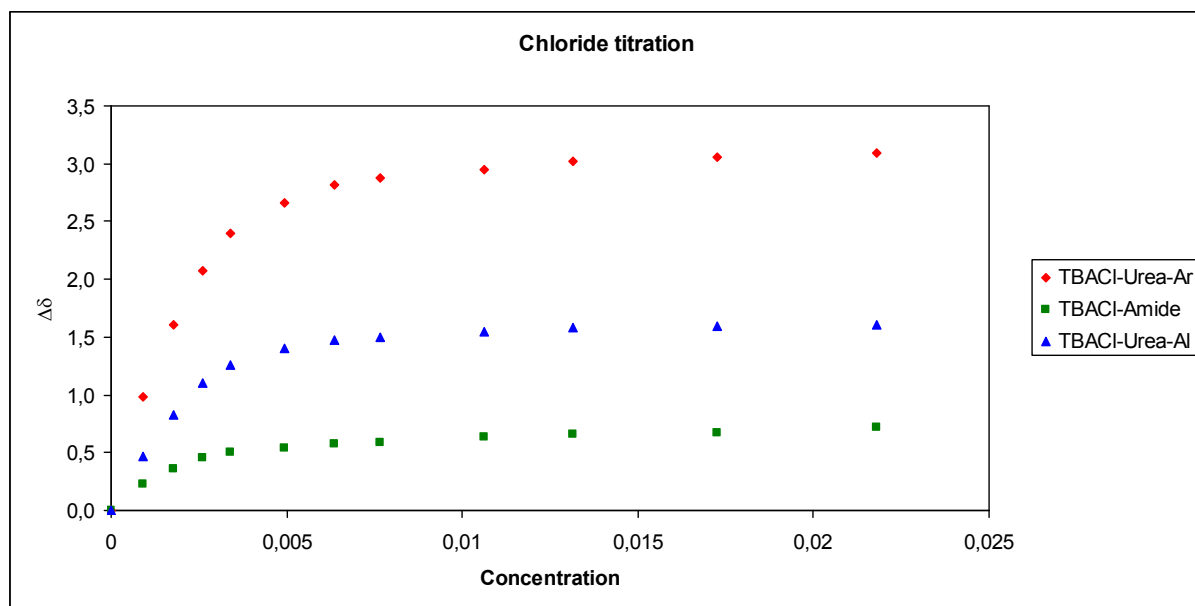

|        |           |
|--------|-----------|
|        | $K_{TBA}$ |
| $Cl^-$ | 3 100     |

### UV-VIS MEASUREMENTS

UV/vis spectra changes of receptor **1d**  $CH_3CN$  solution in the presence of excess of  $NaPF_6$  and  $TBANO_2$ .

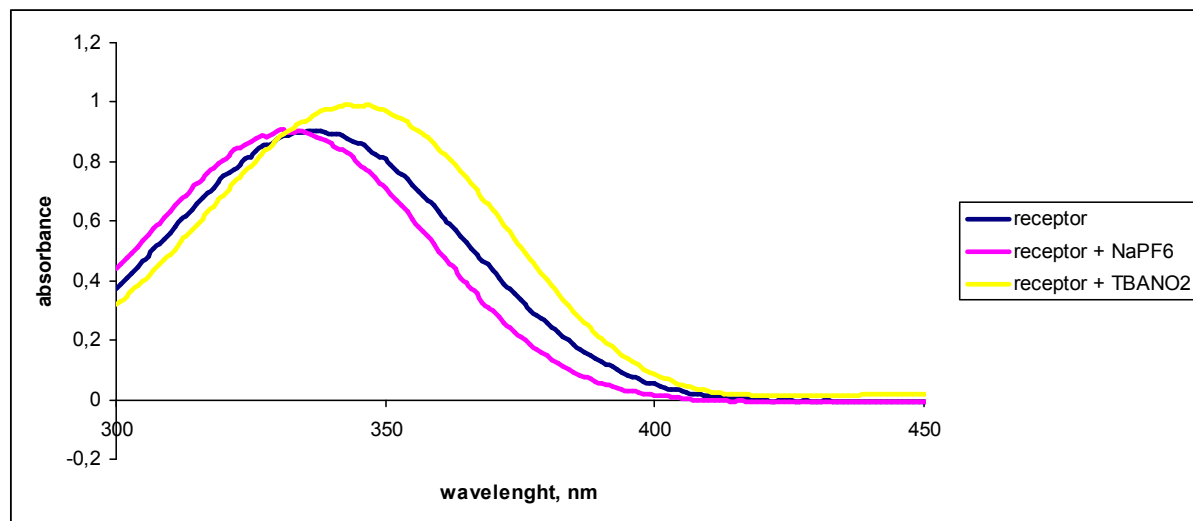

## EXTRACTION and TRANSPORT EXPERIMENTS

The 1.5 mM aqueous solution of NaNO<sub>2</sub> or selected solid salts was extracted with 14 mM of CHCl<sub>3</sub> solution of **1d**. After phase separation a sample of organic phase was diluted with ethyl acetate and methanol (1:9:2 v:v:v, chloroform, ethyl acetate, methanol) and the content of extracted sodium cation was determined *via* atomic absorption spectroscopy. A calibration curve was generated using a standard solution of sodium hexafluorophosphate in chloroform/ethyl acetate/methanol (1:9:2 v:v:v). The results are summarized in Table below.

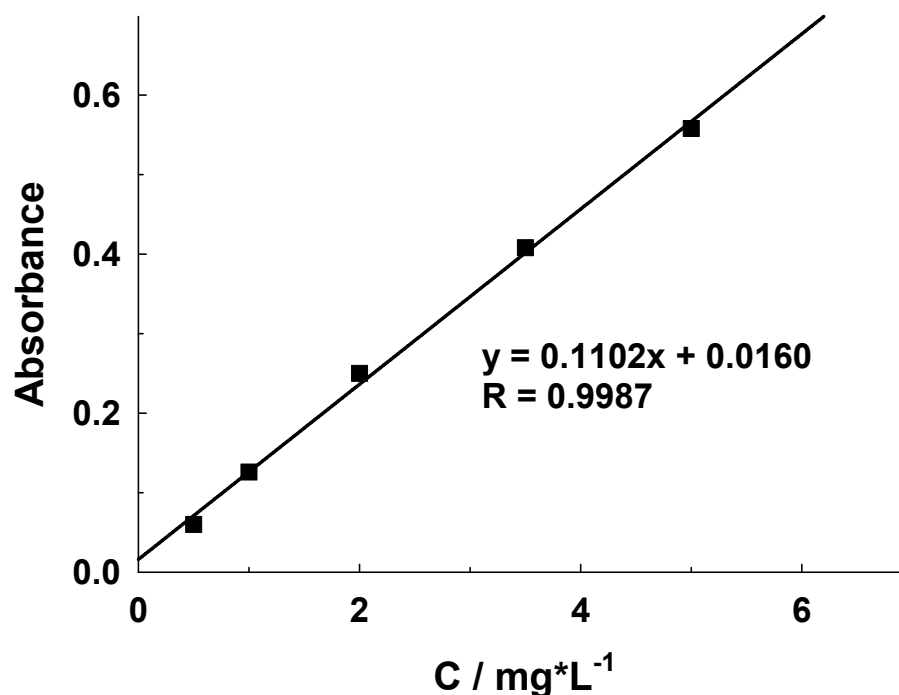

Calibration curve generated by measuring the peak intensities produced by NaPF<sub>6</sub> standard solutions.

### Summary of extraction data.

| <b>1d</b>                 | <b>1.5M NaNO<sub>2</sub></b> | <b>NaNO<sub>2</sub></b> | <b>NaBr</b> | <b>NaNO<sub>3</sub></b> | <b>NaCl</b> |
|---------------------------|------------------------------|-------------------------|-------------|-------------------------|-------------|
| Extraction efficiency [%] | 3.1                          | 47.2                    | 30.1        | 40.5                    | 26.3        |

### Membrane transport procedure.

Membrane transport experiments were performed with magnetic stirring in a conventional U-tube glass cell at room temperature. The feed phase was a 2 ml of 1M NaNO<sub>2</sub> salt; the membrane phase consisted of 3.9·10<sup>-2</sup>M solution (3 ml) of **1d** in chloroform and the receiving phase consisted of 2 ml of distilled water. The salt concentration was determined by conductivity at appropriate intervals.

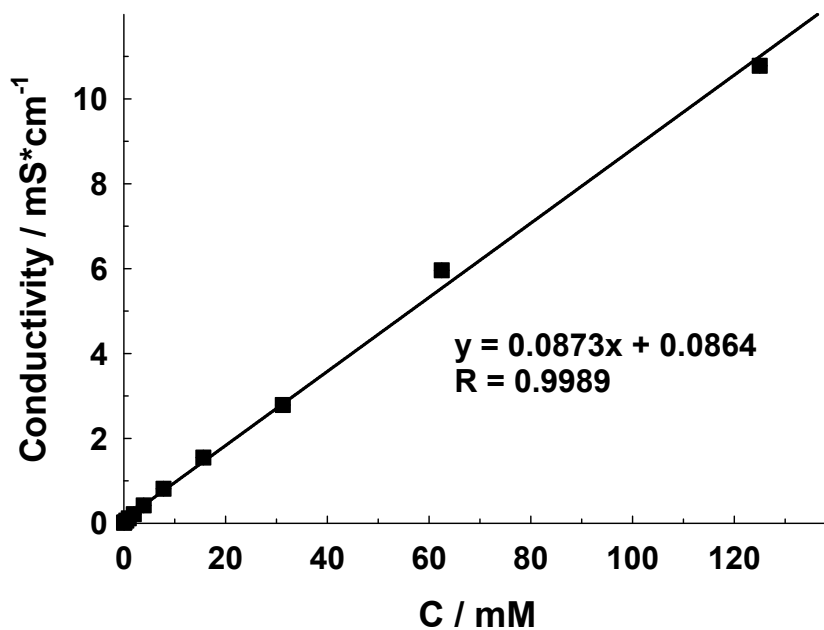

Calibration curve generated by measuring the conductivity produced by NaNO<sub>2</sub> standard solutions.

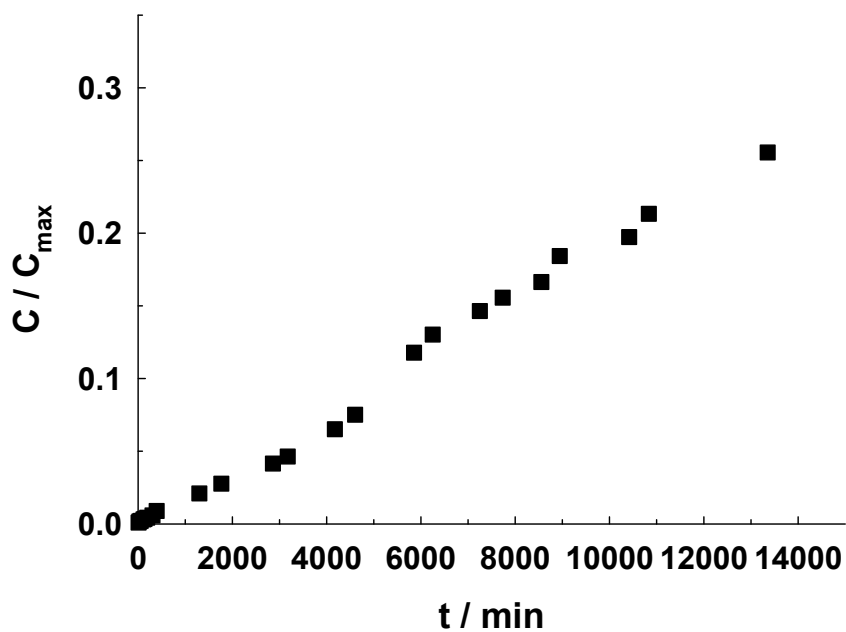

Concentration of sodium nitrite in receiving phase in function of time.

<sup>1</sup> Maeda, H. Furuyoshi, S. Nakatsuji, Y. Okahara, M. *Bull. Chem. Soc. Jpn.*, **1983**, *56*, 212-218.

<sup>2</sup> a) Romański, J.; Trzaskowski, B.; Piątek, P. *Dalton Trans.* **2013**, *42*, 15271-15274; b) Romański, J. Piątek, P. *Chem. Commun.* **2012**, *48*, 11346-11348.
